# Supplementary material for: Aerosol measurement methods to quantify spore emissions from fungi and cryptogamic covers in the Amazon
Source: Copernicus journal article supplement (doi:10.5194/amt-13-153-2020), 2020-01-15
Supplement: Supplementary file 1 [file amt-13-153-2020-supplement.zip]

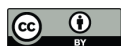

## *Supplement of*

# **Aerosol measurement methods to quantify spore emissions from fungi and cryptogamic covers in the Amazon**

**Nina Löbs et al.**

*Correspondence to:* Nina Löbs (n.loeb@mpic.de), Christopher Pöhlker (c.pohlker@mpic.de), and Bettina Weber (b.weber@mpic.de)

- [amt-13-153-2020-supplement-title-page.pdf](#)
- [Löbs\\_AMT\\_Field\\_Measurement.txt](#)
- [Löbs\\_AMT\\_Laboratory\\_Measurement.txt](#)
- [Löbs\\_AMT\\_OPS\\_BinRanges.txt](#)
- [Löbs\\_AMT\\_Supplement\\_ReadMe.txt](#)

The copyright of individual parts of the supplement might differ from the CC BY 4.0 License.
